# Supplementary material for: A novel anti-PSMA human scFv has the potential to be used as a diagnostic tool in prostate cancer
Source: PubMed Central journal article supplement (PMC5312325; doi:10.18632/oncotarget.10697), 2016-07-19
Supplement: oncotarget-07-59471-s001.pdf [file oncotarget-07-59471-s001.pdf]

## A novel anti-PSMA human scFv has the potential to be used as a diagnostic tool in prostate cancer

### SUPPLEMENTARY FIGURES

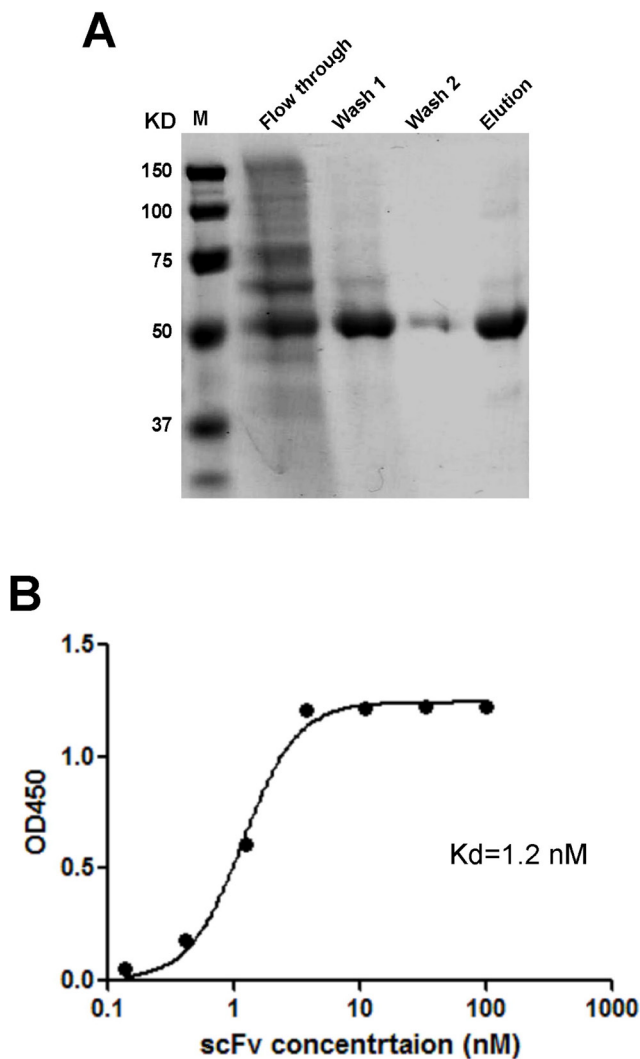

**Supplementary Figure S1: Expression, purification of gy1 in yeast and affinity measurement by capture ELISA. A.** Purification of yeast expressed gy1 scFv. **B.** Affinity measurement of gy1 by capture ELISA. The  $K_d$  was calculated using non-linear regression analysis of a one-site binding hyperbola equation by GraphPad Prism 5.0 software. Representative result was shown from 3 independent experiments.

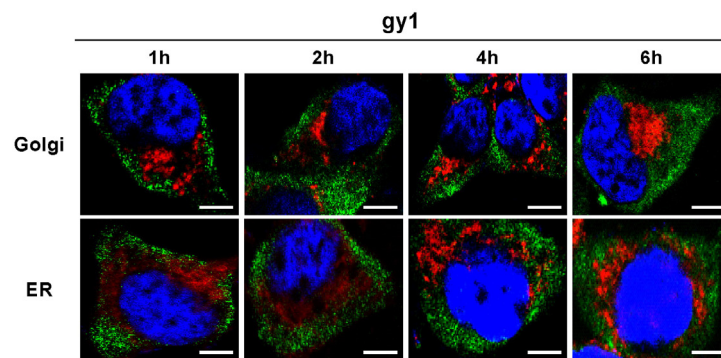

**Supplementary Figure S2: Gy1 is not co-localized with Golgi or ER marker at different time points.** Immunofluorescent staining to examine the potential co-localization of gy1 with Golgi or ER marker at different time points. C4-2 cells were incubated with 200 nM gy1 for different period of time and then stained by anti-6His IgG and FITC-conjugated secondary antibody. Golgi or ER marker (RFP-labeled) and nucleus (blue) were co-stained. Scale bar = 10  $\mu$ m

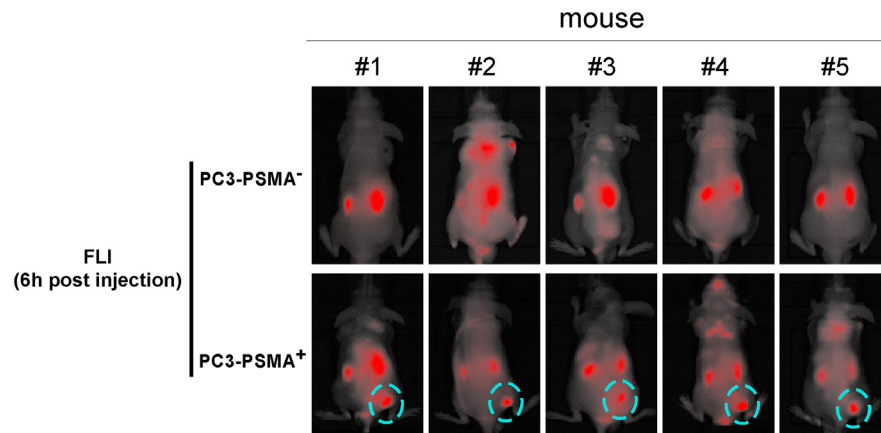

**Supplementary Figure S3: Bio-distribution of IRDye800CW-labeled gy1 in five pairs of PC3-PSMA<sup>+</sup> or PC3-PSMA<sup>-</sup> xenograft nude mice.** The localization of IRDye800CW-labeled gy1 was monitored at 6 h by fluorescence imaging excited at 745 nm after intravenous injection.
